# Supplementary material for: Host/Malassezia Interaction: A Quantitative, Non-Invasive Method Profiling Oxylipin Production Associates Human Skin Eicosanoids with Malassezia
Source: MDPI journal article supplement (doi:10.3390/metabo11100700), 2021-10-13
Supplement: s1 [file s1]

## Supporting Materials

### Host/*Malassezia* Interaction: A Quantitative, Non-Invasive Method Profiling Oxylin Production Associates Human Skin Eicosanoids with *Malassezia*

Yohannes Abere Ambaw <sup>1,2,3†</sup>, Martin P. Pagac <sup>4,†</sup>, Antony S. Irudayaswamy <sup>4</sup>, Manfred Raida <sup>2</sup>, Anne K. Bendt <sup>2</sup>,  
Federico Torta <sup>1,2</sup>, Markus R. Wenk <sup>1,2</sup> and Thomas L. Dawson, Jr. <sup>4,5,\*</sup>

#### Section S1:

##### 1. Lipid mediator extraction from flax-paper

Oxylin extraction was carried out according to the previous publication with small modifications. Briefly, lipids were released from flax paper disks overnight at 4°C with 1 mL of methanol (MeOH): water (H<sub>2</sub>O) (5:95 by v/v) at 900 rpm (revolution per minute) in a thermomixer (Eppendorf, Hamburg, Germany). Samples were spiked with 50 µl of an optimized, mixed deuterated internal standard solution (see Table S2). Oxylin extraction was performed with some modifications of an earlier method [1]. Analytes were extracted using Strata-X 33 u polymer based solid reverse phase (SPE) extraction columns (8B-S100-UBJ, Phenomenex). Columns were conditioned with 3 mL of 100% MeOH and then equilibrated with 3 mL of H<sub>2</sub>O. After loading the sample, the columns were washed with H<sub>2</sub>O: MeOH: acetic acid (90:10:0.1 by v/v) to remove impurities, and the metabolites were then eluted with 2 times 500 µl of 100 % MeOH. The eluant was dried under vacuum and redissolved in 50 µl of the ACN/water/acetic acid (60/40/0.02, v/v). The extracted samples were then subjected to mass spectrometry analysis.

##### 2. Analysis of lipid mediators from cultured *Malassezia*

All *Malassezia* strains were cultured in modified Dixon media (per liter water: 36 g malt extract, 20 g desiccated ox bile, 10 ml Tween-40s, 6 g peptone, 2 ml glycerol, 2 ml oleic acid, pH 6.0) as

reported previously [2]. *Malassezia* strains reported here are *M. globosa* CBS 7996, *M. furfur* CBS14141, *M. sympodialis* CBS 7222. 15 ml of triplicate cultures were grown in a shaker incubator at 32 °C to late exponential growth phase and harvested by centrifugation, washed three times in PBS, transferred to 2 ml Eppendorf tubes and stored at -80°C prior to lipid extraction. The resulting ~1 ml cell pellets were lyophilized in a speedvac and weighted. For lipid extraction, the cell pellet was resuspended in 1 ml water (pH 4.48), acid-washed glass beads were added and the suspension was homogenized by shaking overnight at 900 rpm in a thermomixer at 4°C. The following day, cells were further homogenized in a TissueLyser using standard parameters (2 times for 30 seconds at 5.15 meters/second speed, 4 °C). After a quick centrifugation, the supernatants were transferred into new 2 ml Eppendorf tubes, 100 µl Methanol and ISTD mix were added, followed by a quick centrifugation step. Supernatants were transferred into new 2 ml Eppendorf tubes, 1 ml of cold water (pH 4.48) was added, and lipids were extracted by SPE as described above. Lipidomic analysis was performed by LC-MS/MS using Agilent 6490 mass spectrometer as described above, and lipid concentrations were normalized to previously determined cell pellet dry weights.

## **Section S2:**

### **Targeted LC-MS/MS analysis of lipid mediators**

Lipidomic analysis was performed using LC electrospray ionisation MS/MS (LC-ESI-MS/MS) as previously described [3][4][5][1, 2]. Briefly, an Agilent 6495 triple quadrupole (QQQ) mass spectrometer (Agilent 1290 series HPLC system and a Acquity UPLC BEH shield RP18 column (2.1× 100 mm; 1.7 m; Waters) in negative ion mode was used. The solvent system consisted of solvent A, ACN/water/acetic acid (60/40/0.02, v/v), and solvent B, 1 ACN/IPA (50/50, v/v). The stepwise gradient conditions were carried out for 10 min with flow rate was 0.5 mL/min as follows:

0–5.0 min, 1–55% of solvent B; 5.0–5.5 min, 55–99% of solvent B, and finally 5.5–6.0 min, 99% of solvent B. We used an injection volume was 10  $\mu$ l, and all samples were kept at 4 °C throughout the analysis. The following mass spectrometer conditions were used: gas temperature, 250°C; gas flow rate, 14 L/min; nebuliser, 35 psi; sheath gas temperature, 260°C; capillary voltage, 10 V; and sheath gas flow, 14 L/min. The dynamic MRM option was used and performed for all compounds with optimized transitions and collision energies (see Table S1). The determination and integration of all peaks was manually performed using the MassHunter Workstation software (Agilent, Santa Clara, USA). Peaks were smoothed before integration and peak to peak Signal/Noise ratios were determined using the area under the peaks.

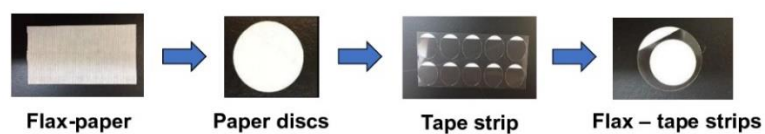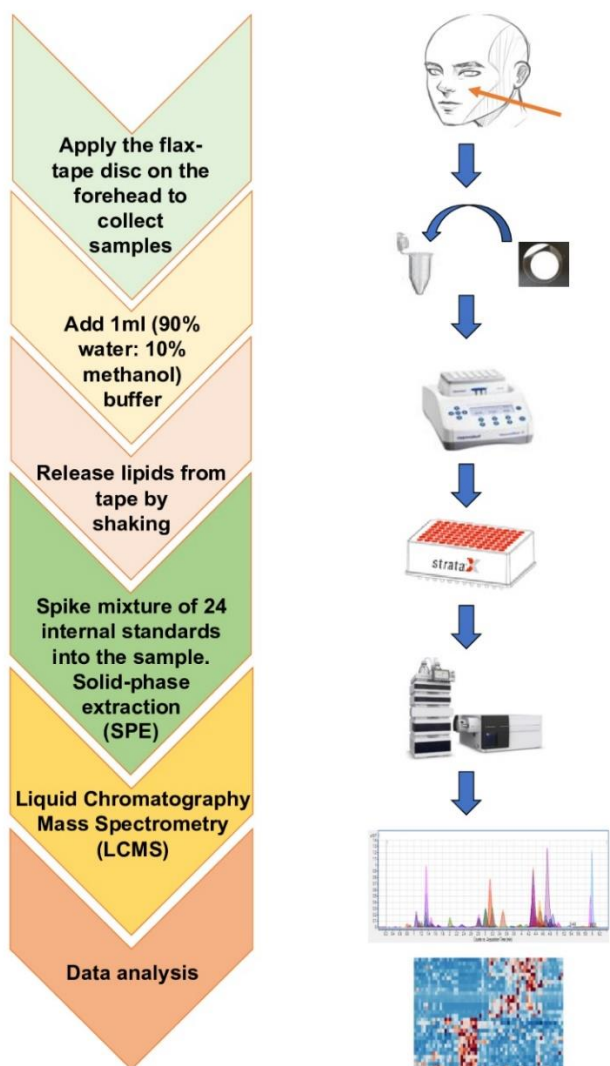

**Figure S1:** Workflow for lipid mediator analysis. The flow chart showing the main steps sample collection, extraction, instrumental analysis and data analysis.

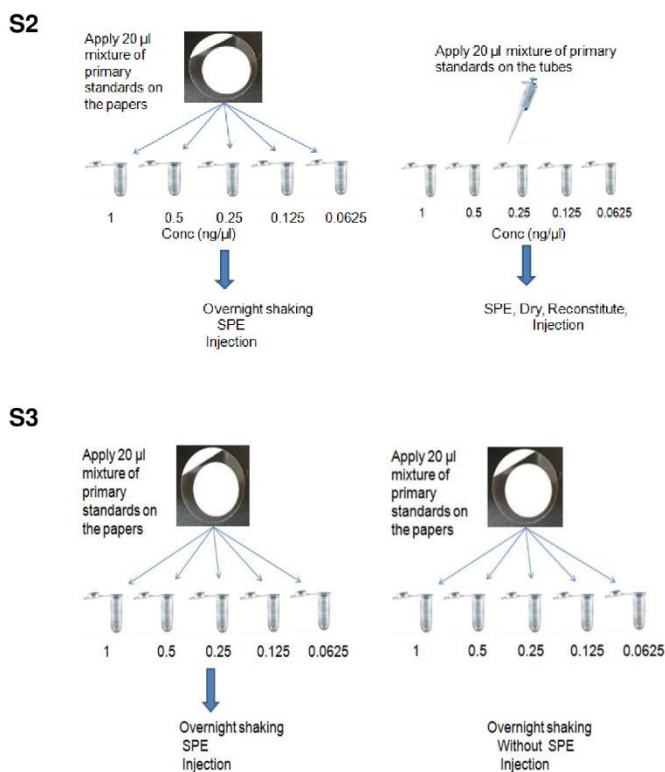

**Figure S2.** Schematic diagram illustrating the procedures for validating the lipid absorbance level of flax-disk-paper. Briefly, different concentrations of mixed non-deuterated standards were applied onto the flax-disk paper and lipids were then extracted. Experiments were performed in triplicates and analyzed.

**Figure S3.** Schematic diagram illustrating the procedures for validating the recovery rate of flax-disk paper and SPE (solid phase extraction). Briefly, different concentrations of mixed non-deuterated standards were applied onto the flax-disk paper and lipids were then extracted. Experiments were performed in triplicates and analyzed.

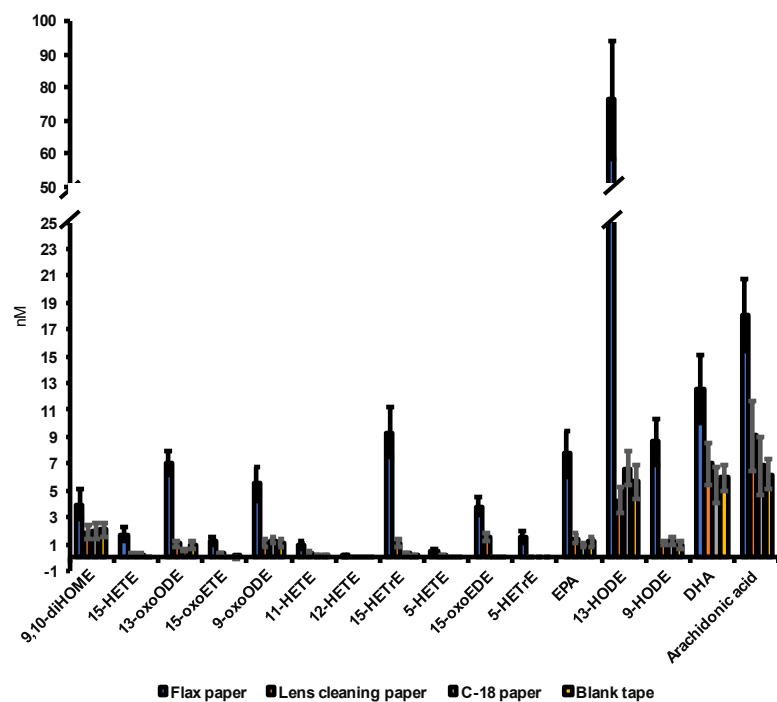

**Figure S4.** Selection of the optimal lipid mediator absorbent. Absorption difference between a subset of trial materials. Flax paper absorbs significantly higher lipid content from human skin (n=3, data indicates in mean  $\pm$  SD).

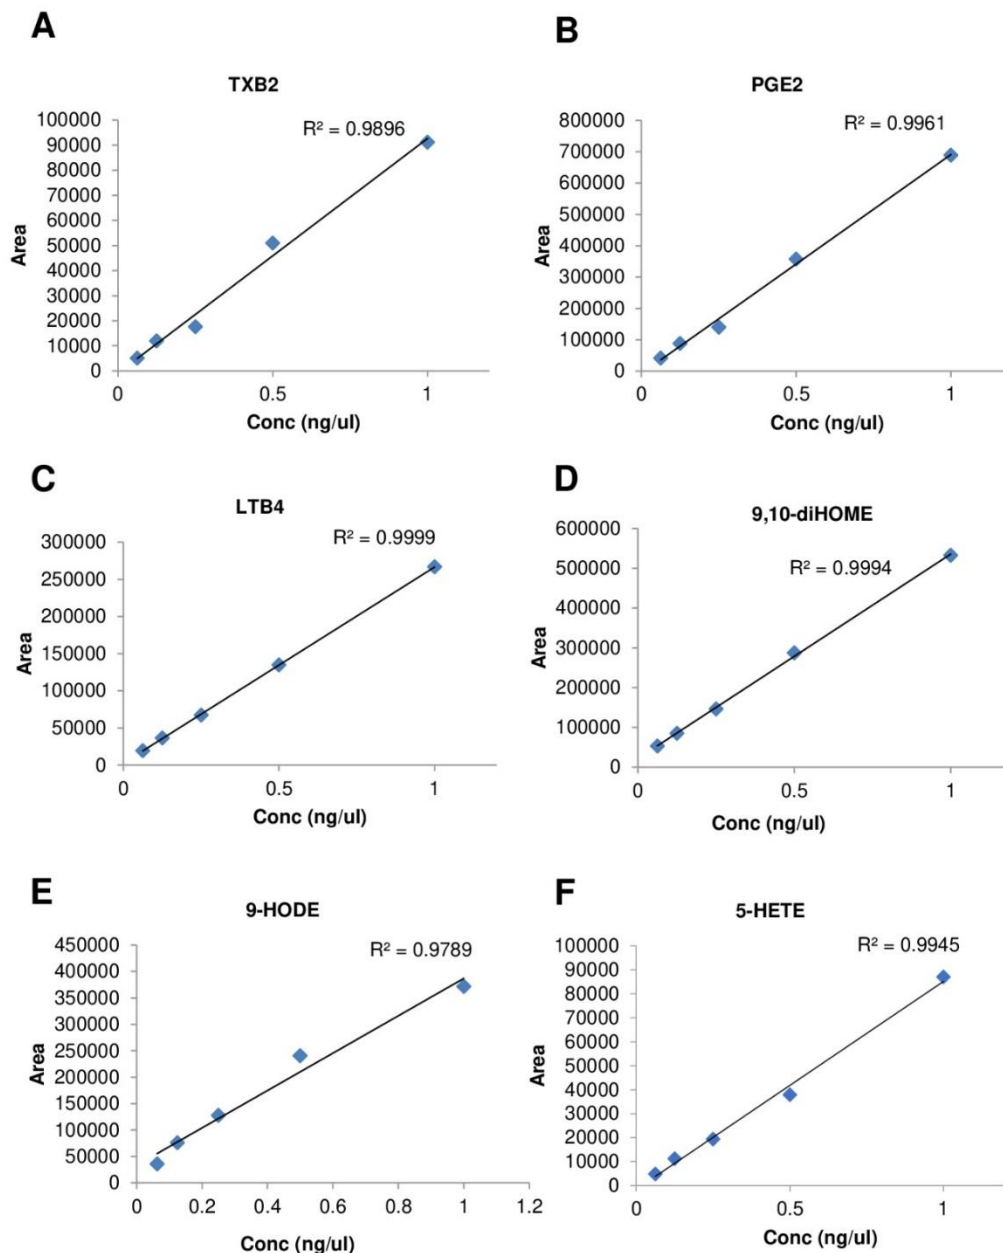

**Figure S5.** Linearity of representative standards TXB2, PGE2, LXB4, 9,10-diHOME, 9-HODE and 5-HETE respectively. Y axis indicate ratio of analyte peak area and X axis indicate the concentration of the analyte standard. All lipid mediators were detected and successfully quantified with satisfactory linearity with  $R^2$  value greater than 0.98, suggesting that flax paper is able to quantitatively absorb skin lipid mediators in a relevant linear range without saturation.

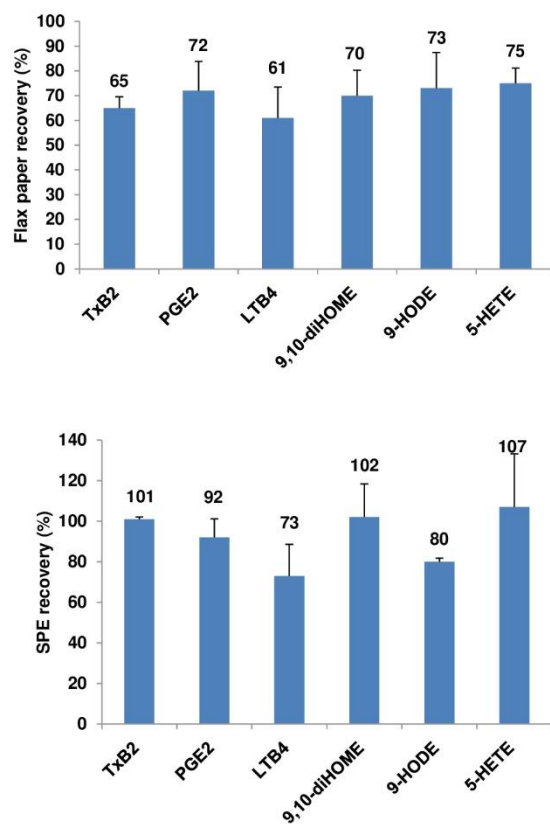

**Figure S6.** Recovery rate of representative standards TXB2, PGE2, LXB4, 9,10-diHOME, 9-HODE and 5-HETE respectively. Y axis indicate % recovery rate of indicated standards from flax paper followed by SPE.

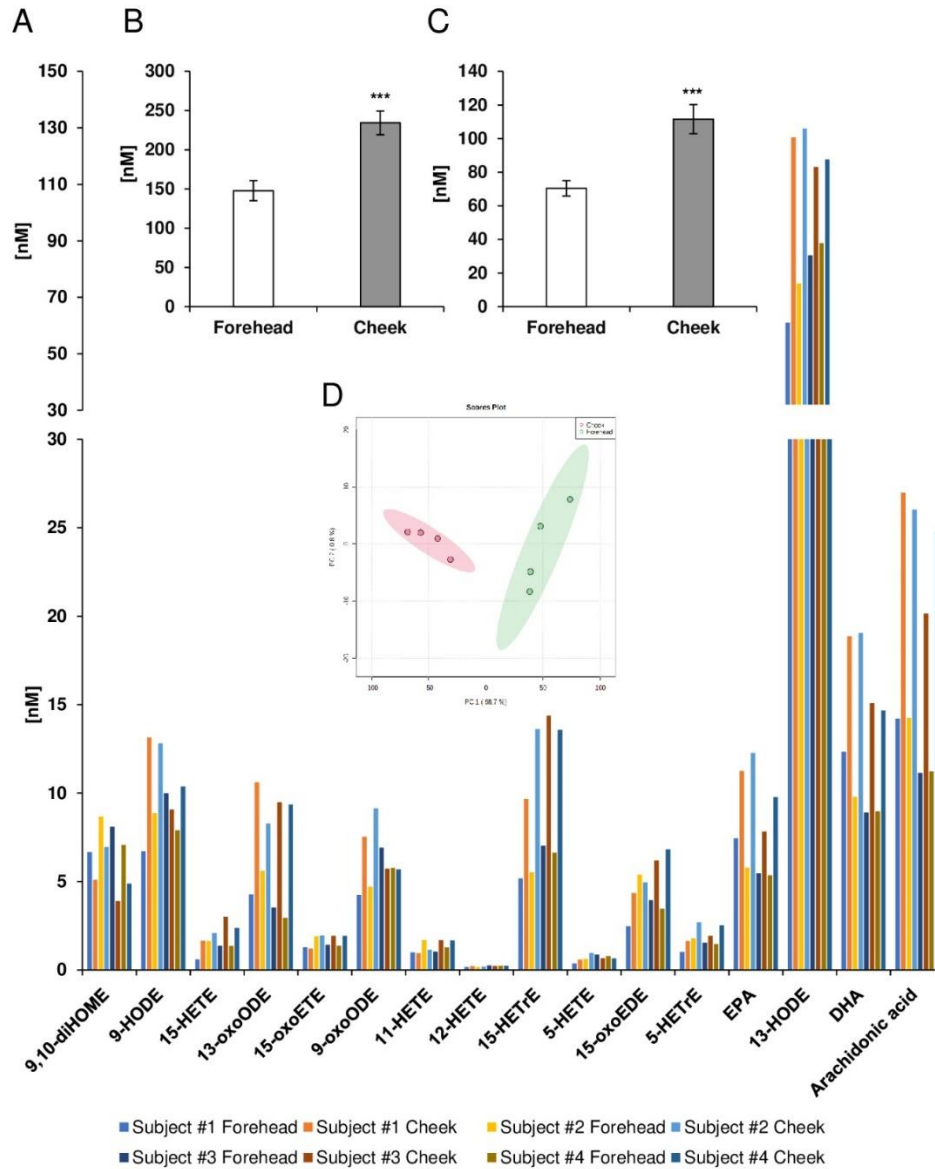

**Figure S7:** A) Direct comparison of facial skin lipid mediator concentrations captured on cheek and forehead by using flax paper disks ( $n=4$ ). B) Total concentrations of lipid mediators detected on cheek are significantly higher than on forehead. C) Same as B), except that the most abundant oxylipin species 13-HODE was excluded ( $*** p \leq 0.001$ ). D) Principal component analysis (PCA) comparing lipid mediator concentrations between cheek and forehead reveals a strong intra-individual variability.

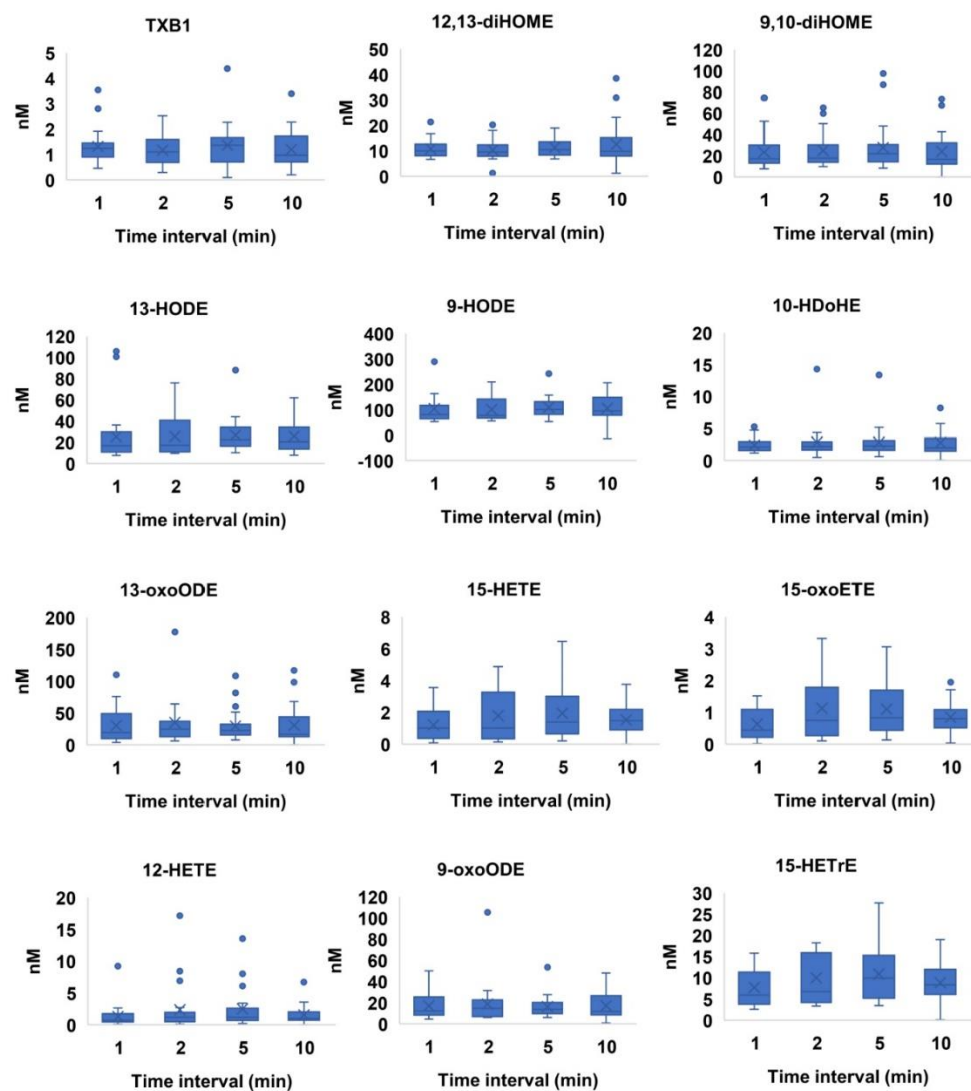

**Figure S8.** Lipid mediator capture difference with time interval between 1-, 2-, 5- and 10-mins collection. Scatter plots showing the median (bold horizontal line), interquartile rang (box) and oxylipin concertation levels in the Y-axis across four different pre-selected time intervals (0, 1, 5 and 10 mins). Results are the mean  $\pm$  S.E.

**Table S1.** List of MRM transitions for eicosanoids species, and non-natural compounds used as internal standards (ISTD). An appropriate internal standard for the quantification of each endogenous lipid is listed. The retention time and collision energy is also reported for each compound. (M1 = precursor ion; M2 = product ion; RT=Retention time in minute and CE=collision energy).

| Compound Name                   | M1    | M2  | ISTD                   | RT   | CE |
|---------------------------------|-------|-----|------------------------|------|----|
| (d4) 6k PGF1                    | 373   | 167 | ISTD                   | 0.87 | 25 |
| (d4) TXB <sub>2</sub>           | 373   | 173 | ISTD                   | 1.17 | 13 |
| (d4) PGF <sub>2α</sub>          | 357   | 197 | ISTD                   | 1.26 | 25 |
| (d4) PGE <sub>2</sub>           | 355   | 275 | ISTD                   | 1.31 | 13 |
| (d4) PGD <sub>2</sub>           | 355   | 193 | ISTD                   | 1.47 | 13 |
| (d4) dhk PGF <sub>2α</sub>      | 357   | 187 | ISTD                   | 1.68 | 21 |
| (d4) dhk PGD <sub>2</sub>       | 355   | 179 | ISTD                   | 1.94 | 19 |
| (d4) 5-iso PGF <sub>2α</sub> VI | 364   | 115 | ISTD                   | 1.14 | 21 |
| (d4) LTB <sub>4</sub>           | 339   | 197 | ISTD                   | 2.79 | 13 |
| (d8) 5-HETE                     | 327   | 116 | ISTD                   | 4.65 | 13 |
| (d8) 12-HETE                    | 327   | 184 | ISTD                   | 4.47 | 13 |
| (d8) 15-HETE                    | 327   | 226 | ISTD                   | 4.22 | 13 |
| (d4) 9-HODE                     | 299   | 172 | ISTD                   | 4.29 | 19 |
| (d4) 13-HODE                    | 299   | 198 | ISTD                   | 4.28 | 13 |
| (d4) Resolvin E1                | 353   | 197 | ISTD                   | 0.96 | 13 |
| (d11) 8,9-EET                   | 330   | 155 | ISTD                   | 4.92 | 9  |
| (d11) 11,12-DHET                | 348   | 167 | ISTD                   | 3.4  | 19 |
| (d11) 14,15-EET                 | 330   | 175 | ISTD                   | 4.78 | 9  |
| (d4) 9,10-diHOME                | 317   | 203 | ISTD                   | 3.15 | 21 |
| (d4) 12,13-diHOME               | 317   | 185 | ISTD                   | 3.05 | 21 |
| (d5) LTE4                       | 443   | 338 | ISTD                   | 2.1  | 17 |
| (d8) Arachidonic acid           | 311   | 267 | ISTD                   | 5.97 | 13 |
| TxB <sub>2</sub>                | 369   | 169 | (d4) TXB <sub>2</sub>  | 1.12 | 13 |
| PGF <sub>2α</sub>               | 353.3 | 193 | (d4) PGF <sub>2α</sub> | 1.2  | 25 |
| PGE <sub>2</sub>                | 351   | 271 | (d4) PGE <sub>2</sub>  | 1.31 | 13 |
| PGD <sub>2</sub>                | 351   | 271 | (d4) PGD <sub>2</sub>  | 1.49 | 13 |
| tetranor 12-HETE                | 265   | 109 | (d4) LTB <sub>4</sub>  | 3.11 | 9  |
| 12-HHTrE                        | 279   | 217 | (d4) LTB <sub>4</sub>  | 3.33 | 13 |
| 11-HETE                         | 319   | 167 | (d8) 5-HETE            | 4.43 | 13 |
| 11-HEPE                         | 317   | 167 | (d8) 5-HETE            | 3.79 | 13 |
| 13-HDoHE                        | 343   | 221 | (d8) 15-HETE           | 4.41 | 13 |
| 9-HETE                          | 319   | 123 | (d8) 5-HETE            | 4.54 | 13 |
| 9-HEPE                          | 317   | 149 | (d8) 5-HETE            | 4.1  | 13 |
| 8-HDoHE                         | 343   | 109 | (d8) 5-HETE            | 4.55 | 13 |
| 16-HDoHE                        | 343   | 233 | (d8) 15-HETE           | 4.34 | 13 |
| 20-HDoHE                        | 343   | 241 | (d8) 15-HETE           | 4.24 | 9  |

|                          |       |     |                       |      |    |
|--------------------------|-------|-----|-----------------------|------|----|
| LTB <sub>4</sub>         | 335   | 195 | (d4) LTB <sub>4</sub> | 2.79 | 13 |
| 6-trans-LTB <sub>4</sub> | 335   | 195 | (d4) LTB <sub>4</sub> | 2.52 | 13 |
| 5,6-diHETE               | 335   | 115 | (d4) LTB <sub>4</sub> | 3.84 | 21 |
| 5-HETE                   | 319   | 115 | (d8) 5-HETE           | 4.66 | 13 |
| 5-HEPE                   | 317   | 115 | (d8) 5-HETE           | 4.05 | 13 |
| 7-HDoHE                  | 343   | 141 | (d8) 5-HETE           | 4.54 | 13 |
| 4-HDoHE                  | 343   | 101 | (d8) 5-HETE           | 4.81 | 9  |
| 9-HOTrE                  | 293   | 171 | (d8) 5-HETE           | 3.66 | 13 |
| 6S-LXA <sub>4</sub>      | 351.3 | 115 | (d4) LTB <sub>4</sub> | 1.89 | 9  |
| Resolvin E1              | 349   | 195 | (d4) Resolvin E1      | 0.89 | 13 |
| Resolvin D1              | 375   | 141 | (d4) Resolvin E1      | 1.74 | 13 |
| Protectin D1             | 359   | 153 | (d4) Resolvin E1      | 1.85 | 13 |
| 8,15-diHETE              | 335   | 235 | (d4) LTB <sub>4</sub> | 2.51 | 19 |
| 15-HETE                  | 319   | 175 | (d8) 15-HETE          | 4.34 | 13 |
| 15-HEPE                  | 317   | 219 | (d8) 5-HETE           | 3.81 | 13 |
| 17 HDoHE                 | 343   | 229 | (d8) 15-HETE          | 4.32 | 9  |
| 13-HODE                  | 295   | 195 | (d4) 13-HODE          | 4.27 | 13 |
| 13-HOTrE                 | 293   | 195 | (d4) 13-HODE          | 3.85 | 19 |
| 15-HETrE                 | 321   | 221 | (d8) 15-HETE          | 4.69 | 13 |
| 8-HETE                   | 319   | 155 | (d8) 5-HETE           | 4.54 | 9  |
| 8-HEPE                   | 317   | 155 | (d8) 5-HETE           | 4.04 | 21 |
| 10-HDoHE                 | 343   | 153 | (d8) 5-HETE           | 4.45 | 9  |
| 8-HETrE                  | 321   | 157 | (d8) 5-HETE           | 4.72 | 13 |
| 12-HETE                  | 319   | 135 | (d8) 12-HETE          | 4.43 | 13 |
| 12-HEPE                  | 317   | 179 | (d8) 12-HETE          | 3.88 | 9  |
| 14-HDoHE                 | 343   | 205 | (d8) 15-HETE          | 4.43 | 9  |
| 11-HDoHE                 | 343   | 149 | (d8) 15-HETE          | 4.58 | 11 |
| 9-HODE                   | 295   | 171 | (d4) 9-HODE           | 4.26 | 19 |
| 12-oxoETE                | 317   | 153 | (d8) 15-HETE          | 4.42 | 13 |
| 15-oxoETE                | 317   | 113 | (d8) 15-HETE          | 4.33 | 13 |
| 20-HETE                  | 319.3 | 275 | (d8) 15-HETE          | 3.84 | 13 |
| 19-HETE                  | 319   | 231 | (d8) 15-HETE          | 3.78 | 13 |
| 18-HETE                  | 319   | 261 | (d8) 15-HETE          | 3.82 | 9  |
| 17-HETE                  | 319   | 247 | (d8) 15-HETE          | 4.11 | 9  |
| 16-HETE                  | 319   | 189 | (d8) 15-HETE          | 4.03 | 9  |
| 18-HEPE                  | 317   | 215 | (d8) 15-HETE          | 3.7  | 9  |
| 5,6-EET                  | 319   | 191 | (d11) 8,9-EET         | 5.19 | 9  |
| 8,9-EET                  | 319   | 123 | (d11) 8,9-EET         | 5.07 | 9  |
| 11,12-EET                | 319   | 167 | (d11) 14,15-EET       | 4.95 | 9  |
| 14,15-EET                | 319   | 219 | (d11) 14,15-EET       | 4.78 | 9  |
| 19(20)-EpDPE             | 343   | 241 | (d8) 15-HETE          | 4.7  | 9  |
| 19,20-DiHDPA             | 361   | 229 | (d11) 11,12-DHET      | 3.28 | 13 |
| 5,6-diHETrE              | 337.3 | 145 | (d11) 11,12-DHET      | 3.82 | 13 |

|                  |       |     |                       |      |    |
|------------------|-------|-----|-----------------------|------|----|
| 8,9-diHETrE      | 337.2 | 127 | (d11) 11,12-DHET      | 3.65 | 19 |
| 11,12-diHETrE    | 337.3 | 167 | (d11) 11,12-DHET      | 3.53 | 13 |
| 14,15-diHETrE    | 337.3 | 207 | (d11) 11,12-DHET      | 3.24 | 13 |
| 9,10-diHOME      | 313   | 201 | (d4) 9,10-diHOME      | 3.19 | 21 |
| 12,13-diHOME     | 313   | 183 | (d4) 12,13-diHOME     | 3    | 21 |
| 9,10-EpOME       | 295   | 171 | (d11) 8,9-EET         | 4.8  | 13 |
| 12,13-EpOME      | 295   | 195 | (d11) 8,9-EET         | 4.75 | 13 |
| Arachidonic acid | 303   | 259 | (d8) Arachidonic acid | 5.92 | 13 |
| Adrenic acid     | 331   | 287 | (d8) Arachidonic acid | 6.03 | 13 |
| EPA              | 301   | 257 | (d8) Arachidonic acid | 5.78 | 9  |
| DHA              | 327   | 283 | (d8) Arachidonic acid | 5.93 | 9  |

**Table S2.** Oxylipins internal standards and their concentrations in MS analysis

| Internal standards | Conc. (nM) |
|--------------------|------------|
| (d4) 6k PGF1       | 6          |
| (d4) dhk PGF2      | 6          |
| (d4) PGF2          | 6          |
| (d5) LTC4          | 3.5        |
| (d5) LTE4          | 5          |
| (d4) Resolvin E1   | 6          |
| (d4) PGD2          | 6          |
| (d4) 5-iso PGF2 VI | 6          |
| (d8) 5-HETE        | 7          |
| (d6) 20-HETE       | 7          |
| (d7) 5-oxoETE      | 7          |
| (d8) 12-HETE       | 7          |
| (d8) 15-HETE       | 7          |
| (d4) 12,13-diHOME  | 2          |
| (d11) 11,12-DHET   | 1.5        |
| (d4) PGE2          | 1          |
| (d4) LTB4          | 3          |
| (d4) 13-HODE       | 1.5        |
| (d4) 9-HODE        | 1.5        |
| (d4) 9,10-diHOME   | 1.5        |
| (d4) TXB2          | 2          |
| (d4) dhk PGD2      | 4.5        |
| (d11) 8,9-EET      | 7          |
| (d11) 14,15-EET    | 7          |

|                       |    |
|-----------------------|----|
| (d8) Arachidonic acid | 10 |
|-----------------------|----|

## References

1. Y. Wang, A. M. Armando, O. Quehenberger, C. Yan, and E. A. Dennis, "Comprehensive ultra-performance liquid chromatographic separation and mass spectrometric analysis of eicosanoid metabolites in human samples," *J. Chromatogr. A*, vol. 1359, pp. 60–69, Sep. 2014.
2. Y. M. DeAngelis *et al.*, "Isolation and Expression of a *Malassezia globosa* Lipase Gene, LIP1," *J. Invest. Dermatol.*, vol. 127, no. 9, pp. 2138–2146, Sep. 2007.
3. Y. A. Ambaw *et al.*, "Tear eicosanoids in healthy people and ocular surface disease," *Sci. Rep.*, 2018.
4. Y. A. Ambaw *et al.*, "Changes of tear lipid mediators after eyelid warming or thermopulsation treatment for meibomian gland dysfunction.," *Prostaglandins Other Lipid Mediat.*, vol. 151, p. 106474, Dec. 2020.
5. Y. A. Ambaw, D. P. Timbadia, M. Raida, F. Torta, M. R. Wenk, and L. Tong, "Profile of tear lipid mediator as a biomarker of inflammation for meibomian gland dysfunction and ocular surface diseases: Standard operating procedures," *Ocul. Surf.*, Oct. 2020.
6. Ambaw, Y.A., et al., Change of tear lipid mediators in a post-trabeculectomy cohort. *Ocul Surf*, 2020. **18**(4): p. 565-574
7. Ambaw, Y.A., et al., Tailored Polymer-Based Selective Extraction of Lipid Mediators from Biological Samples. *Metabolites*, 2021. **11**(8): p. 539.
